# Supplementary material
Source: MDPI journal article supplement (https://www.mdpi.com/2071-1050/14/12/7075)
Supplement: s1 [file s1]

## Supplementary Materials S1. Guidelines of air pollutant concentrations

**Table S1.** Ambient air quality standard in China (Source: Adapted by the Authors, data extracted from the Chinese Environmental protection Agency).

| Category                            | Concentration Limit          |                              |
|-------------------------------------|------------------------------|------------------------------|
|                                     | Level-1                      | Level-2                      |
| Air quality index                   | 50*                          | 100*                         |
| PM2.5                               | 35 $\mu\text{g}/\text{m}^3$  | 75 $\mu\text{g}/\text{m}^3$  |
| PM10                                | 50 $\mu\text{g}/\text{m}^3$  | 150 $\mu\text{g}/\text{m}^3$ |
| Ozone (O <sub>3</sub> )             | 100 $\mu\text{g}/\text{m}^3$ | 160 $\mu\text{g}/\text{m}^3$ |
| Nitrogen dioxide (NO <sub>2</sub> ) | 40 $\mu\text{g}/\text{m}^3$  | 80 $\mu\text{g}/\text{m}^3$  |
| Sulfur dioxide (SO <sub>2</sub> )   | 50 $\mu\text{g}/\text{m}^3$  | 150 $\mu\text{g}/\text{m}^3$ |
| Carbon monoxide (CO)                | 2 $\text{mg}/\text{m}^3$     | 4 $\text{mg}/\text{m}^3$     |

\*The criteria value is from MEEC (Ministry of Ecology and Environment of China), 2012.

**Table S2.** WHO Guidelines value for air pollution (WHO, 2000)

| Category                            | WHO Guidelines value         | WHO Interim target-1         |
|-------------------------------------|------------------------------|------------------------------|
| Air quality index                   | 50*                          | 100*                         |
| PM2.5                               | 10 $\mu\text{g}/\text{m}^3$  | 35 $\mu\text{g}/\text{m}^3$  |
| PM10                                | 20 $\mu\text{g}/\text{m}^3$  | 70 $\mu\text{g}/\text{m}^3$  |
| Ozone (O <sub>3</sub> )             | 120 $\mu\text{g}/\text{m}^3$ | 160 $\mu\text{g}/\text{m}^3$ |
| Nitrogen dioxide (NO <sub>2</sub> ) | 40 $\mu\text{g}/\text{m}^3$  | /                            |
| Sulfur dioxide (SO <sub>2</sub> )   | 20 $\mu\text{g}/\text{m}^3$  | 50 $\mu\text{g}/\text{m}^3$  |

## Supplementary Materials S2. The mean level of air parameters

- In low-level districts

**Table S3.** Mean level of air indicators in low-level districts

| District            | Air quality parameters  | Closure period                 | After closure                   | Increase percentage |
|---------------------|-------------------------|--------------------------------|---------------------------------|---------------------|
| Shangcheng district | O <sub>3</sub>          | 78.35 $\mu\text{g}/\text{m}^3$ | 96.97 $\mu\text{g}/\text{m}^3$  | 23.77%              |
|                     | PM10                    | 26.57 $\mu\text{g}/\text{m}^3$ | 52.44 $\mu\text{g}/\text{m}^3$  | 97.41%              |
|                     | CO                      | 0.84 $\text{mg}/\text{m}^3$    | 0.81 $\text{mg}/\text{m}^3$     | -3.64%              |
|                     | NO <sub>2</sub>         | 7.87 $\mu\text{g}/\text{m}^3$  | 28.41 $\mu\text{g}/\text{m}^3$  | 261.07%             |
|                     | PM2.5                   | 21.30 $\mu\text{g}/\text{m}^3$ | 27.07 $\mu\text{g}/\text{m}^3$  | 27.07%              |
|                     | SO <sub>2</sub>         | 6.78 $\mu\text{g}/\text{m}^3$  | 7.08 $\mu\text{g}/\text{m}^3$   | 4.36%               |
|                     | AQI (air quality index) | 39.26                          | 57.43                           | 46.27%              |
|                     |                         |                                |                                 |                     |
| District            | Air quality parameters  | Closure period                 | After closure                   | Increase percentage |
| Xiacheng district   | O <sub>3</sub>          | 86.65 $\mu\text{g}/\text{m}^3$ | 111.32 $\mu\text{g}/\text{m}^3$ | 28.47%              |
|                     | PM10                    | 43.30 $\mu\text{g}/\text{m}^3$ | 66.59 $\mu\text{g}/\text{m}^3$  | 53.78%              |
|                     | CO                      | 0.93 $\text{mg}/\text{m}^3$    | 0.79 $\text{mg}/\text{m}^3$     | -15.64%             |
|                     | NO <sub>2</sub>         | 20.57 $\mu\text{g}/\text{m}^3$ | 52.64 $\mu\text{g}/\text{m}^3$  | 155.95%             |
|                     | PM2.5                   | 33.43 $\mu\text{g}/\text{m}^3$ | 33.86 $\mu\text{g}/\text{m}^3$  | 1.28%               |
|                     | SO <sub>2</sub>         | 6.74 $\mu\text{g}/\text{m}^3$  | 7.56 $\mu\text{g}/\text{m}^3$   | 12.14%              |
|                     | AQI (air quality index) | 52.48                          | 70.98                           | 35.24%              |

- In mid-level districts

**Table S4.** Mean level of air indicators in mid-level districts

| District      | Air quality parameters | Closure period                 | After closure                   | Increase percentage |
|---------------|------------------------|--------------------------------|---------------------------------|---------------------|
| Xihu district | O <sub>3</sub>         | 91.32 $\mu\text{g}/\text{m}^3$ | 117.32 $\mu\text{g}/\text{m}^3$ | 28.48%              |
|               | PM10                   | 36.44 $\mu\text{g}/\text{m}^3$ | 53.12 $\mu\text{g}/\text{m}^3$  | 45.80%              |

|                   |                         |                   |                    |         |
|-------------------|-------------------------|-------------------|--------------------|---------|
|                   | CO                      | 0.59 $mg/m^3$     | 1.07 $mg/m^3$      | 82.14%  |
|                   | NO <sub>2</sub>         | 11.82 $\mu g/m^3$ | 34.32 $\mu g/m^3$  | 190.39% |
|                   | PM2.5                   | 27.28 $\mu g/m^3$ | 28.60 $\mu g/m^3$  | 4.86%   |
|                   | SO <sub>2</sub>         | 4.51 $\mu g/m^3$  | 5.54 $\mu g/m^3$   | 22.79%  |
|                   | AQI (air quality index) | 52.51             | 64.12              | 22.11%  |
| Jianggan district | O <sub>3</sub>          | 74.37 $\mu g/m^3$ | 94.08 $\mu g/m^3$  | 26.50%  |
|                   | PM10                    | 37.98 $\mu g/m^3$ | 58.81 $\mu g/m^3$  | 54.85%  |
|                   | CO                      | 0.97 $mg/m^3$     | 0.75 $mg/m^3$      | -22.71% |
|                   | NO <sub>2</sub>         | 13.20 $\mu g/m^3$ | 38.41 $\mu g/m^3$  | 191.11% |
|                   | PM2.5                   | 29.56 $\mu g/m^3$ | 31.03 $\mu g/m^3$  | 4.95%   |
|                   | SO <sub>2</sub>         | 5.02 $\mu g/m^3$  | 4.85 $\mu g/m^3$   | -3.42%  |
|                   | AQI (air quality index) | 47.80             | 61.79              | 29.26%  |
| Binjiang district | O <sub>3</sub>          | 82.96 $\mu g/m^3$ | 105.11 $\mu g/m^3$ | 26.70%  |
|                   | PM10                    | 35.13 $\mu g/m^3$ | 54.55 $\mu g/m^3$  | 55.28%  |
|                   | CO                      | 0.73 $mg/m^3$     | 0.74 $mg/m^3$      | -0.29%  |
|                   | NO <sub>2</sub>         | 10.70 $\mu g/m^3$ | 35.51 $\mu g/m^3$  | 232.04% |
|                   | PM2.5                   | 26.93 $\mu g/m^3$ | 29.5 $\mu g/m^3$   | 9.52%   |
|                   | SO <sub>2</sub>         | 5.54 $\mu g/m^3$  | 5.51 $\mu g/m^3$   | -0.66%  |
|                   | AQI (air quality index) | 45.72             | 59.97              | 31.18%  |
| Gongshu district  | O <sub>3</sub>          | 86.28 $\mu g/m^3$ | 111.61 $\mu g/m^3$ | 29.36%  |
|                   | PM10                    | 44.43 $\mu g/m^3$ | 71.04 $\mu g/m^3$  | 59.88%  |
|                   | CO                      | 0.56 $mg/m^3$     | 0.74 $mg/m^3$      | 30.73%  |
|                   | NO <sub>2</sub>         | 10.07 $\mu g/m^3$ | 33.36 $\mu g/m^3$  | 231.43% |
|                   | PM2.5                   | 33.28 $\mu g/m^3$ | 34.62 $\mu g/m^3$  | 4.02%   |
|                   | SO <sub>2</sub>         | 6.07 $\mu g/m^3$  | 8.14 $\mu g/m^3$   | 34.25%  |
|                   | AQI                     | 52.15             | 66.57              | 27.65%  |

● In high-level district

**Table S5.** Mean level of air indicators in high-level districts

| District          | Air quality parameters  | Closure period    | After closure      | Increase percentage |
|-------------------|-------------------------|-------------------|--------------------|---------------------|
| Yuhang district   | O <sub>3</sub>          | 90.89 $\mu g/m^3$ | 114.99 $\mu g/m^3$ | 26.51%              |
|                   | PM10                    | 43.39 $\mu g/m^3$ | 84.41 $\mu g/m^3$  | 99.11%              |
|                   | CO                      | 0.89 $mg/m^3$     | 0.88 $mg/m^3$      | -1.12%              |
|                   | NO <sub>2</sub>         | 13.43 $\mu g/m^3$ | 40.80 $\mu g/m^3$  | 203.70%             |
|                   | PM2.5                   | 32 $\mu g/m^3$    | 36.74 $\mu g/m^3$  | 14.80%              |
|                   | SO <sub>2</sub>         | 5.26 $\mu g/m^3$  | 6.31 $\mu g/m^3$   | 20.02%              |
|                   | AQI (air quality index) | 53.33             | 71.34              | 33.79%              |
| Xiaoshan district | O <sub>3</sub>          | 86.35 $\mu g/m^3$ | 109.65 $\mu g/m^3$ | 26.99%              |
|                   | PM10                    | 45.22 $\mu g/m^3$ | 66.06 $\mu g/m^3$  | 46.10%              |
|                   | CO                      | 0.57 $mg/m^3$     | 0.64 $mg/m^3$      | 12.72%              |
|                   | NO <sub>2</sub>         | 16.22 $\mu g/m^3$ | 42.89 $\mu g/m^3$  | 164.49%             |
|                   | PM2.5                   | 36.63 $\mu g/m^3$ | 37.20 $\mu g/m^3$  | 1.56%               |
|                   | SO <sub>2</sub>         | 6.35 $\mu g/m^3$  | 5.56 $\mu g/m^3$   | -12.34%             |
|                   | AQI                     | 56.09             | 66.09              | 17.84%              |

## Supplementary Materials S3. Pearson Correlations Coefficients

- In the lockdown period:

**Table S6.** Pearson correlation coefficient of Xiacheng district in lockdown

|              |                 | O <sub>3</sub> | PM10  | CO      | NO <sub>2</sub> | PM2.5 | SO <sub>2</sub> | AQI   |
|--------------|-----------------|----------------|-------|---------|-----------------|-------|-----------------|-------|
| Construction | Pearson         | 0.306          | 0.129 | -0.473  | -0.323          | 0.080 | -0.682          | 0.154 |
| site number  | Correlation     |                |       |         |                 |       |                 |       |
|              | Sig. (2-tailed) | 0.217          | 0.609 | 0.048** | 0.192           | 0.753 | 0.002*          | 0.541 |
|              | N               | 18             | 18    | 18      | 18              | 18    | 18              | 18    |

**Table S7.** Pearson correlative coefficient of Gongshu district in lockdown

|              |                 | O <sub>3</sub> | PM10  | CO    | NO <sub>2</sub> | PM2.5 | SO <sub>2</sub> | AQI   |
|--------------|-----------------|----------------|-------|-------|-----------------|-------|-----------------|-------|
| Construction | Pearson         | 0.037          | 0.285 | 0.289 | 0.478           | 0.333 | 0.567           | 0.282 |
| site number  | Correlation     |                |       |       |                 |       |                 |       |
|              | Sig. (2-tailed) | 0.884          | 0.252 | 0.245 | 0.045**         | 0.177 | 0.014*          | 0.257 |
|              | N               | 18             | 18    | 18    | 18              | 18    | 18              | 18    |

**Table S8.** Pearson correlative coefficient of Xiaoshan district in lockdown

|              |                 | O <sub>3</sub> | PM10   | CO     | NO <sub>2</sub> | PM2.5  | SO <sub>2</sub> | AQI    |
|--------------|-----------------|----------------|--------|--------|-----------------|--------|-----------------|--------|
| Construction | Pearson         | 0.635          | 0.662  | 0.723  | -0.051          | 0.668  | 0.635           | 0.702  |
| site number  | Correlation     |                |        |        |                 |        |                 |        |
|              | Sig. (2-tailed) | 0.005*         | 0.003* | 0.001* | 0.841           | 0.002* | 0.005*          | 0.001* |
|              | N               | 18             | 18     | 18     | 18              | 18     | 18              | 18     |

- After the lockdown

**Table S9.** Pearson correlative coefficient of Xiacheng district after the lockdown

|              |             | O <sub>3</sub> | PM10  | CO     | NO <sub>2</sub> | PM2.5  | SO <sub>2</sub> | AQI   |
|--------------|-------------|----------------|-------|--------|-----------------|--------|-----------------|-------|
| Construction | Pearson     | -0.004         | 0.061 | -0.039 | 0.400           | -0.002 | -0.103          | 0.180 |
| site number  | Correlation |                |       |        |                 |        |                 |       |

|  |                 |       |       |       |        |       |       |       |
|--|-----------------|-------|-------|-------|--------|-------|-------|-------|
|  | Sig. (2-tailed) | 0.972 | 0.633 | 0.759 | 0.001* | 0.985 | 0.422 | 0.158 |
|  | N               | 63    | 63    | 63    | 63     | 63    | 63    | 63    |

**Table S10.** Pearson correlative coefficient of Gongshu district after the lockdown

|              |                 | O <sub>3</sub> | PM10   | CO     | NO <sub>2</sub> | PM2.5 | SO <sub>2</sub> | AQI    |
|--------------|-----------------|----------------|--------|--------|-----------------|-------|-----------------|--------|
| Construction | Pearson         | -0.291         | -0.098 | -0.040 | -0.560          | 0.212 | -0.330          | -0.211 |
| site number  | Correlation     |                |        |        |                 |       |                 |        |
|              | Sig. (2-tailed) | 0.021**        | 0.446  | 0.753  | 0.000*          | 0.095 | 0.008*          | 0.098  |
|              | N               | 63             | 63     | 63     | 63              | 63    | 63              | 63     |

**Table S11.** Pearson correlative coefficient of Xiaoshan district after the lockdown

|              |                 | O <sub>3</sub> | PM10   | CO     | NO <sub>2</sub> | PM2.5 | SO <sub>2</sub> | AQI    |
|--------------|-----------------|----------------|--------|--------|-----------------|-------|-----------------|--------|
| Construction | Pearson         | -0.430         | -0.370 | -0.075 | -0.439          | 0.134 | -0.222          | -0.237 |
| site number  | Correlation     |                |        |        |                 |       |                 |        |
|              | Sig. (2-tailed) | 0.000*         | 0.773  | 0.558  | 0.000*          | 0.295 | 0.080           | 0.062  |
|              | N               | 63             | 63     | 63     | 63              | 63    | 63              | 63     |

\*Correlation is significant at the 0.01 level (2-tailed).

\*\*Correlation is significant at the 0.05 level (2-tailed).

Supplementary Materials S4. Scatter plots

- In the lockdown period

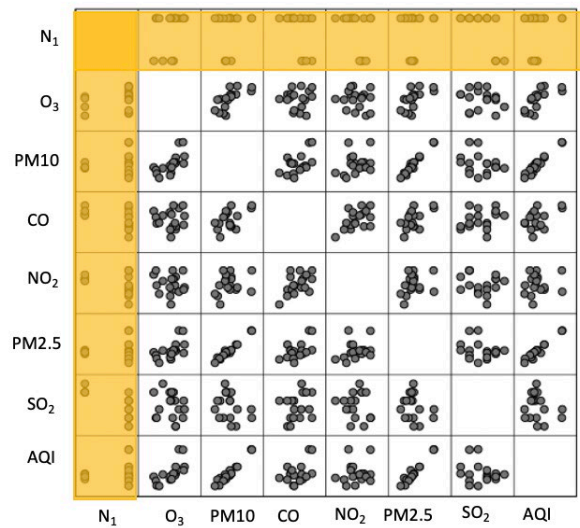

Figure S1. Correlative scatter plot of XiaCheng district

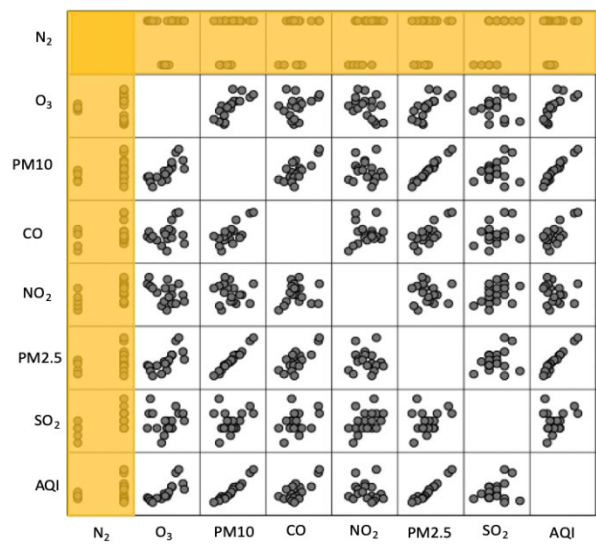

Figure S2. Correlative scatter plot of Gongshu district

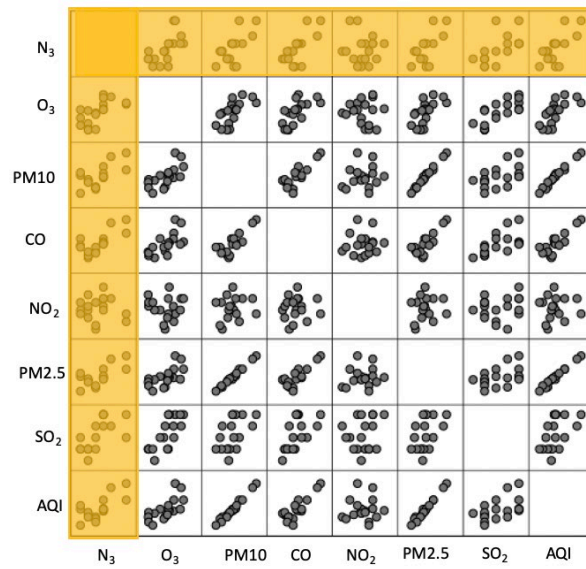

**Figure S3.** Correlative scatter plot of Xiaoshan district

- After the lockdown

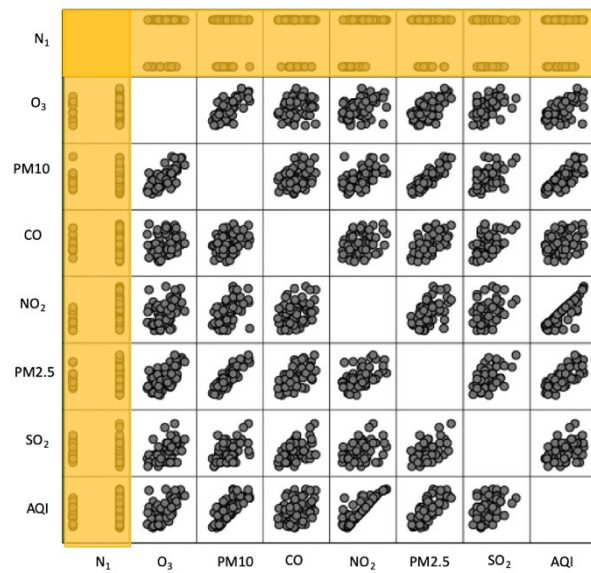

**Figure S4.** Correlative scatter plot of XiaCheng district



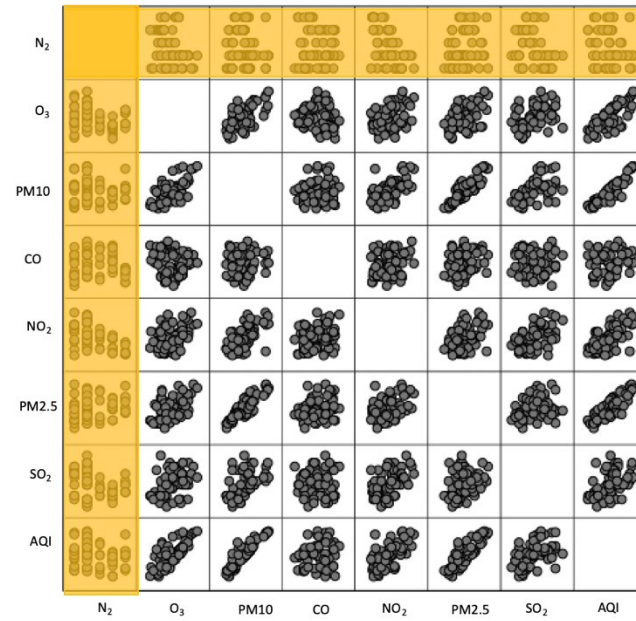

**Figure S5.** Correlative scatter plot of Gongshu district

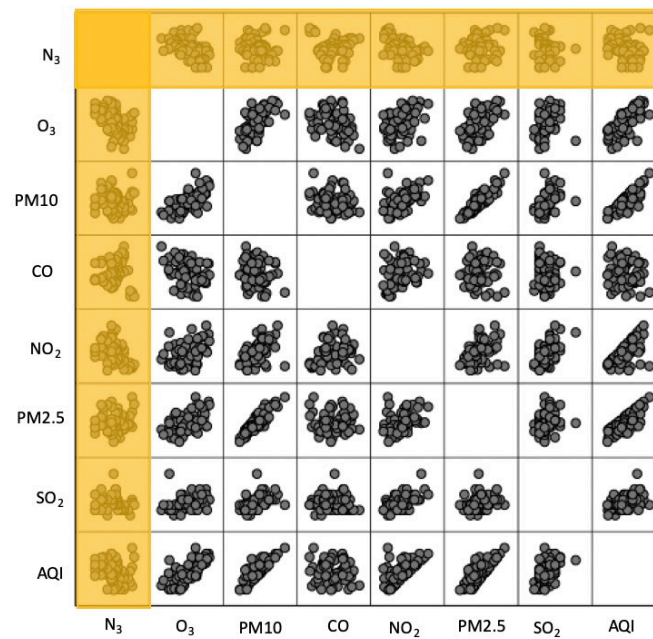

**Figure S6.** Correlative scatter plot of Xiaoshan district

**\*Note:**  $N_1$ ,  $N_2$ ,  $N_3$  are the number of the construction sites in Xiacheng, Gongshu, Xiaoshan district respectively.

## Supplementary Materials S5. Modelling Abstract

- In the lockdown period

**Table S12.** Model summary of Xiacheng district in the lockdown period

| Model | R                  | R Square | Adjusted R Square | Std. Error of the Estimate |
|-------|--------------------|----------|-------------------|----------------------------|
| 1     | 0.814 <sup>1</sup> | 0.662    | 0.617             | 0.265                      |
| 2     | 0.829 <sup>2</sup> | 0.687    | 0.469             | 0.312                      |
| 3     | 0.815 <sup>3</sup> | 0.664    | 0.643             | 0.256                      |
| 4     | 1.000 <sup>4</sup> | 1.000    | /                 | /                          |

1: Predictors: (Constant), SO<sub>2</sub>, NO<sub>2</sub>.

2: Predictors: (Constant), O<sub>3</sub>, PM10, CO, NO<sub>2</sub>, PM2.5, SO<sub>2</sub>, AQI.

3: Predictors: (Constant), NO<sub>2</sub>\*SO<sub>2</sub>.

4: Predictors: (Constant), AQI, CO\*SO<sub>2</sub>, NO<sub>2</sub><sup>2</sup>, O<sub>3</sub>\*SO<sub>2</sub>, CO, O<sub>3</sub>\*NO<sub>2</sub>, PM10\*SO<sub>2</sub>, O<sub>3</sub><sup>2</sup>, PM2.5\*SO<sub>2</sub>, NO<sub>2</sub>\*PM2.5, AQI<sup>2</sup>, NO<sub>2</sub>\*SO<sub>2</sub>, SO<sub>2</sub>\*AQI, SO<sub>2</sub><sup>2</sup>, NO<sub>2</sub>, CO\*NO<sub>2</sub>, SO<sub>2</sub>.

**Table S13.** Model summary of Gongshu district in the lockdown period

| Model | R                  | R Square | Adjusted R Square | Std. Error of the Estimate |
|-------|--------------------|----------|-------------------|----------------------------|
| 1     | 0.567 <sup>1</sup> | 0.321    | 0.279             | 0.39134                    |
| 1     | 0.703 <sup>2</sup> | 0.495    | 0.141             | 0.42709                    |
| 2     | 0.567 <sup>3</sup> | 0.321    | 0.279             | 0.39134                    |
| 3     | 0.995 <sup>4</sup> | 0.990    | 0.832             | 0.18915                    |

1: Predictors: (Constant), SO<sub>2</sub>.

2: Predictors: (Constant), O<sub>3</sub>, PM10, CO, NO<sub>2</sub>, PM2.5, SO<sub>2</sub>, AQI.

3: Predictors: (Constant), SO<sub>2</sub>.

4: Predictors: (Constant), SO<sub>2</sub>\*AQI, NO<sub>2</sub>, SO<sub>2</sub><sup>2</sup>, CO, O<sub>3</sub><sup>2</sup>, CO<sup>2</sup>, PM10\*NO<sub>2</sub>, O<sub>3</sub>\*NO<sub>2</sub>, CO\*NO<sub>2</sub>, PM2.5, NO<sub>2</sub>\*AQI, PM10<sup>2</sup>, CO\*PM2.5, SO<sub>2</sub>, O<sub>3</sub>\*PM2.5, NO<sub>2</sub>\*SO<sub>2</sub>.

**Table S14.** Model summary of Xiaoshan district in the lockdown period

| Model | R                  | R Square | Adjusted R Square | Std. Error of the Estimate |
|-------|--------------------|----------|-------------------|----------------------------|
| 1     | 0.723 <sup>1</sup> | 0.523    | 0.493             | 1.288                      |
| 2     | 0.923 <sup>2</sup> | 0.853    | 0.750             | 0.905                      |

|   |                    |       |       |       |
|---|--------------------|-------|-------|-------|
| 3 | 0.779 <sup>3</sup> | 0.607 | 0.582 | 1.169 |
| 4 | 1.000 <sup>4</sup> | 1.000 | /     | /     |

1: Predictors: (Constant), CO.

2: Predictors: (Constant), O<sub>3</sub>, PM10, CO, NO<sub>2</sub>, PM2.5, SO<sub>2</sub>, AQI.

3: Predictors: (Constant), CO\*SO<sub>2</sub>.

4: Predictors: (Constant), AQI, NO<sub>2</sub><sup>2</sup>, SO<sub>2</sub>, O<sub>3</sub><sup>2</sup>, CO, PM10<sup>2</sup>, O<sub>3</sub>\*NO<sub>2</sub>, PM10\*NO<sub>2</sub>, NO<sub>2</sub>, PM2.5, CO<sup>2</sup>, O<sub>3</sub>, PM10\*SO<sub>2</sub>, NO<sub>2</sub>\*SO<sub>2</sub>, O<sub>3</sub>\*PM2.5, SO<sub>2</sub><sup>2</sup>, O<sub>3</sub>\*CO.

# ● After the lockdown

**Table S15.** Model summary of Xiacheng district after the lockdown

| Model | R                  | R Square | Adjusted R Square | Std. Error of the Estimate |
|-------|--------------------|----------|-------------------|----------------------------|
| 1     | 0.494 <sup>1</sup> | 0.244    | 0.219             | 0.361                      |
| 2     | 0.540 <sup>2</sup> | 0.291    | 0.201             | 0.365                      |
| 3     | 0.496 <sup>3</sup> | 0.246    | 0.221             | 0.360                      |
| 1     | 0.885 <sup>4</sup> | 0.784    | 0.521             | 0.282                      |

1: Predictors: (Constant), NO<sub>2</sub>, AQI.

2: Predictors: (Constant), O<sub>3</sub>, PM10, CO, NO<sub>2</sub>, PM2.5, SO<sub>2</sub>, AQI.

3: Predictors: (Constant), NO<sub>2</sub>, CO\*AQI.

4: Predictors: (Constant), O<sub>3</sub>, PM10, CO, NO<sub>2</sub>, PM2.5, SO<sub>2</sub>, AQI, O<sub>3</sub><sup>2</sup>, PM10<sup>2</sup>, CO<sup>2</sup>, NO<sub>2</sub><sup>2</sup>, PM2.5<sup>2</sup>, SO<sub>2</sub><sup>2</sup>, AQI<sup>2</sup>, O<sub>3</sub>\*PM10, O<sub>3</sub>\*CO, O<sub>3</sub>\*NO<sub>2</sub>, O<sub>3</sub>\*PM2.5, O<sub>3</sub>\*SO<sub>2</sub>, O<sub>3</sub>\*AQI, PM10\*CO, PM10\*NO<sub>2</sub>, PM10\*PM2.5, PM10\*SO<sub>2</sub>, PM10\*AQI, CO\*NO<sub>2</sub>, CO\*PM2.5, CO\*SO<sub>2</sub>, CO\*AQI, NO<sub>2</sub>\*PM2.5, NO<sub>2</sub>\*SO<sub>2</sub>, PM2.5\*SO<sub>2</sub>, PM2.5\*AQI, SO<sub>2</sub>\*AQI.

**Table S16.** Model summary of Gongshu district after the lockdown

| Model | R                  | R Square | Adjusted R Square | Std. Error of the Estimate |
|-------|--------------------|----------|-------------------|----------------------------|
| 1     | 0.789 <sup>1</sup> | 0.622    | 0.603             | 0.81460                    |
| 2     | 0.794 <sup>2</sup> | 0.631    | 0.584             | 0.83347                    |
| 3     | 0.811 <sup>3</sup> | 0.657    | 0.640             | 0.77589                    |
| 4     | 0.958 <sup>4</sup> | 0.918    | 0.830             | 0.53243                    |

1: Predictors: (Constant), NO<sub>2</sub>, PM2.5, AQI.

2: Predictors: (Constant), O<sub>3</sub>, PM10, CO, NO<sub>2</sub>, PM2.5, SO<sub>2</sub>, AQI.

3: Predictors: (Constant), NO<sub>2</sub>, PM2.5, PM2.5\*AQI.

4: Predictors: (Constant), O<sub>3</sub>, PM10, CO, NO<sub>2</sub>, PM2.5, SO<sub>2</sub>, AQI, O<sub>3</sub><sup>2</sup>, PM10<sup>2</sup>, CO<sup>2</sup>, NO<sub>2</sub><sup>2</sup>, PM2.5<sup>2</sup>, SO<sub>2</sub><sup>2</sup>, AQI<sup>2</sup>, O<sub>3</sub>\*PM10, O<sub>3</sub>\*CO, O<sub>3</sub>\*NO<sub>2</sub>, O<sub>3</sub>\*PM2.5, O<sub>3</sub>\*SO<sub>2</sub>, O<sub>3</sub>\*AQI, PM10\*CO, PM10\*NO<sub>2</sub>, PM10\*SO<sub>2</sub>, CO\*NO<sub>2</sub>, CO\*PM2.5, CO\*SO<sub>2</sub>, CO\*AQI, NO<sub>2</sub>\*PM2.5, NO<sub>2</sub>\*SO<sub>2</sub>, NO<sub>2</sub>\*AQI, PM2.5\*SO<sub>2</sub>, SO<sub>2</sub>\*AQI.

**Table S17.** Model summary of Xiaoshan district after the lockdown

| Model | R                  | R Square | Adjusted R Square | Std. Error of the Estimate |
|-------|--------------------|----------|-------------------|----------------------------|
| 1     | 0.740 <sup>1</sup> | 0.548    | 0.516             | 3.225                      |
| 2     | 0.753 <sup>2</sup> | 0.567    | 0.512             | 3.240                      |
| 3     | 0.811 <sup>3</sup> | 0.657    | 0.621             | 2.857                      |
| 4     | 0.922 <sup>4</sup> | 0.850    | 0.679             | 2.629                      |

1: Predictors: (Constant), NO<sub>2</sub>, PM2.5, O<sub>3</sub>, CO.

2: Predictors: (Constant), O<sub>3</sub>, PM10, CO, NO<sub>2</sub>, PM2.5, SO<sub>2</sub>, AQI.

3: Predictors: (Constant), O<sub>3</sub>\*CO, PM2.5, AQI, NO<sub>2</sub>\*PM2.5, NO<sub>2</sub><sup>2</sup>, NO<sub>2</sub>.

4: Predictors: (Constant), O<sub>3</sub>, PM10, CO, NO<sub>2</sub>, PM2.5, SO<sub>2</sub>, AQI, O<sub>3</sub><sup>2</sup>, PM10<sup>2</sup>, CO<sup>2</sup>, NO<sub>2</sub><sup>2</sup>, PM2.5<sup>2</sup>, SO<sub>2</sub><sup>2</sup>, AQI<sup>2</sup>, O<sub>3</sub>\*PM10, O<sub>3</sub>\*CO, O<sub>3</sub>\*NO<sub>2</sub>, O<sub>3</sub>\*PM2.5, O<sub>3</sub>\*SO<sub>2</sub>, O<sub>3</sub>\*AQI, PM10\*CO, PM10\*NO<sub>2</sub>, PM10\*SO<sub>2</sub>, CO\*NO<sub>2</sub>, CO\*PM2.5, CO\*SO<sub>2</sub>, CO\*AQI, NO<sub>2</sub>\*PM2.5, NO<sub>2</sub>\*SO<sub>2</sub>, NO<sub>2</sub>\*AQI, PM2.5\*SO<sub>2</sub>, PM2.5\*AQI, SO<sub>2</sub>\*AQI, O<sub>3</sub>, PM10, CO, NO<sub>2</sub>, PM2.5, SO<sub>2</sub>, AQI.

## Supplementary Materials S6. Correlative Coefficient

- In the lockdown period

For Xiacheng district:

**Table S18.** Correlative coefficients of XiaCheng district

| Model                             | Unstandardised Coefficients |            |
|-----------------------------------|-----------------------------|------------|
|                                   | B                           | Std. Error |
| (Constant)                        | -3.509                      | 0.000      |
| O <sub>3</sub>                    | 0.025                       | 0.000      |
| CO                                | 9.975                       | 0.000      |
| NO <sub>2</sub>                   | 1.035                       | 0.000      |
| SO <sub>2</sub>                   | 1.692                       | 0.000      |
| NO <sub>2</sub> <sup>2</sup>      | -0.006                      | 0.000      |
| SO <sub>2</sub> <sup>2</sup>      | -0.064                      | 0.000      |
| 4 O <sub>3</sub> *NO <sub>2</sub> | -0.002                      | 0.000      |
| O <sub>3</sub> *SO <sub>2</sub>   | 0.003                       | 0.000      |
| PM10*SO <sub>2</sub>              | -0.001                      | 0.000      |
| CO*NO <sub>2</sub>                | 0.548                       | 0.000      |
| NO <sub>2</sub> *PM2.5            | 0.004                       | 0.000      |
| NO <sub>2</sub> *SO <sub>2</sub>  | -0.043                      | 0.000      |
| PM2.5*SO <sub>2</sub>             | -0.007                      | 0.000      |
| SO <sub>2</sub> *AQI              | 0.001                       | 0.000      |

\* Dependent Variable: construction sites number of Xiacheng district

For Gongshu district:

**Table S19.** Correlative coefficients of Gongshu district

| Model      | Unstandardised Coefficients |            |
|------------|-----------------------------|------------|
|            | B                           | Std. Error |
| (Constant) | 82.219                      | 7.877      |
| 4 CO       | 7.725                       | 5.387      |

|                                  |           |       |
|----------------------------------|-----------|-------|
| NO <sub>2</sub>                  | -2.210    | 1.091 |
| PM2.5                            | 0.117     | 0.150 |
| SO <sub>2</sub>                  | 2.186     | 1.704 |
| O <sub>3</sub> <sup>2</sup>      | -4.375E-5 | 0.000 |
| CO <sup>2</sup>                  | -1.279    | 1.348 |
| SO <sub>2</sub> <sup>2</sup>     | -0.730    | 0.176 |
| O <sub>3</sub> *NO <sub>2</sub>  | -0.003    | 0.003 |
| O <sub>3</sub> *PM2.5            | 0.001     | 0.001 |
| PM10*NO <sub>2</sub>             | -0.019    | 0.009 |
| CO*NO <sub>2</sub>               | -1.943    | 0.567 |
| CO*PM2.5                         | 0.013     | 0.052 |
| NO <sub>2</sub> *SO <sub>2</sub> | 0.667     | 0.206 |
| NO <sub>2</sub> *AQI             | 0.010     | 0.004 |

\* Dependent Variable: construction sites number of Gongshu district

For Xiaoshan district:

**Table S20.** Correlative coefficients of Xiaoshan district

| Model                        | Unstandardised Coefficients |            |
|------------------------------|-----------------------------|------------|
|                              | B                           | Std. Error |
| (Constant)                   | 294.222                     | 0.000      |
| O <sub>3</sub>               | 0.005                       | 0.000      |
| CO                           | -57.723                     | 0.000      |
| NO <sub>2</sub>              | -1.607                      | 0.000      |
| PM2.5                        | 0.249                       | 0.000      |
| SO <sub>2</sub>              | -4.927                      | 0.000      |
| AQI                          | -0.287                      | 0.000      |
| O <sub>3</sub> <sup>2</sup>  | -0.001                      | 0.000      |
| CO <sup>2</sup>              | 15.398                      | 0.000      |
| NO <sub>2</sub> <sup>2</sup> | 0.045                       | 0.000      |

|                                  |        |       |
|----------------------------------|--------|-------|
| PM2.5 <sup>2</sup>               | -0.004 | 0.000 |
| O <sub>3</sub> *PM10             | 0.003  | 0.000 |
| O <sub>3</sub> *CO               | 0.690  | 0.000 |
| O <sub>3</sub> *NO <sub>2</sub>  | -0.018 | 0.000 |
| PM10*CO                          | -0.253 | 0.000 |
| PM10*NO <sub>2</sub>             | -0.004 | 0.000 |
| NO <sub>2</sub> *SO <sub>2</sub> | 0.221  | 0.000 |
| SO <sub>2</sub> *AQI             | 0.047  | 0.000 |

\* Dependent Variable: construction sites number of Xiaoshan district

#### ● After the lockdown

For Xiacheng district:

**Table S21.** Correlative coefficients of XiaCheng district

| Model                           | Unstandardised Coefficients |            |
|---------------------------------|-----------------------------|------------|
|                                 | B                           | Std. Error |
| (Constant)                      | 14.725                      | 3.217      |
| O <sub>3</sub>                  | -0.005                      | 0.021      |
| PM10                            | 0.016                       | 0.053      |
| CO                              | 9.206                       | 8.497      |
| NO <sub>2</sub>                 | 0.006                       | 0.062      |
| PM2.5                           | -0.234                      | 0.115      |
| SO <sub>2</sub>                 | 0.051                       | 0.369      |
| AQI                             | 0.072                       | 0.076      |
| O <sub>3</sub> <sup>2</sup>     | 1.006E-5                    | 0.000      |
| CO <sup>2</sup>                 | -7.026                      | 6.348      |
| PM2.5 <sup>2</sup>              | -0.001                      | 0.002      |
| SO <sub>2</sub> <sup>2</sup>    | -0.029                      | 0.019      |
| O <sub>3</sub> *CO              | 0.038                       | 0.028      |
| O <sub>3</sub> *NO <sub>2</sub> | -0.001                      | 0.001      |

|                                  |           |       |
|----------------------------------|-----------|-------|
| O <sub>3</sub> *PM2.5            | -0.001    | 0.001 |
| O <sub>3</sub> *SO <sub>2</sub>  | -0.001    | 0.001 |
| O <sub>3</sub> *AQI              | 0.001     | 0.001 |
| PM10*CO                          | -0.024    | 0.076 |
| PM10*NO <sub>2</sub>             | -4.310E-5 | 0.001 |
| PM10*SO <sub>2</sub>             | 0.003     | 0.003 |
| PM10*AQI                         | -0.001    | 0.001 |
| CO*NO <sub>2</sub>               | 0.196     | 0.100 |
| CO*PM2.5                         | 0.254     | 0.162 |
| CO*SO <sub>2</sub>               | 0.511     | 0.554 |
| CO*AQI                           | -0.334    | 0.106 |
| NO <sub>2</sub> *SO <sub>2</sub> | -0.004    | 0.008 |
| PM2.5*SO <sub>2</sub>            | -0.003    | 0.007 |
| PM2.5*AQI                        | 0.003     | 0.002 |
| SO <sub>2</sub> *AQI             | 0.002     | 0.008 |

\* Dependent Variable: construction sites number of Xiacheng district

For Gongshu district:

**Table S22.** Correlative coefficients of Gongshu district

| Model           | Unstandardised Coefficients |            |
|-----------------|-----------------------------|------------|
|                 | B                           | Std. Error |
| (Constant)      | 91.825                      | 8.218      |
| O <sub>3</sub>  | -0.054                      | 0.075      |
| PM10            | 0.062                       | 0.140      |
| CO              | -10.688                     | 7.850      |
| NO <sub>2</sub> | -0.271                      | 0.176      |
| PM2.5           | 0.509                       | 0.198      |
| SO <sub>2</sub> | -0.356                      | 0.993      |
| AQI             | -0.316                      | 0.227      |



|                                  |          |       |
|----------------------------------|----------|-------|
| PM10 <sup>2</sup>                | 1.194E-5 | 0.000 |
| CO <sup>2</sup>                  | -0.958   | 0.779 |
| NO <sub>2</sub> <sup>2</sup>     | -0.005   | 0.002 |
| PM2.5 <sup>2</sup>               | 0.002    | 0.001 |
| SO <sub>2</sub> <sup>2</sup>     | -0.037   | 0.043 |
| AQI <sup>2</sup>                 | -0.001   | 0.001 |
| O <sub>3</sub> *PM10             | -0.001   | 0.001 |
| O <sub>3</sub> *CO               | 0.023    | 0.081 |
| O <sub>3</sub> *NO <sub>2</sub>  | 0.001    | 0.001 |
| O <sub>3</sub> *PM2.5            | -0.001   | 0.001 |
| O <sub>3</sub> *SO <sub>2</sub>  | -0.010   | 0.005 |
| O <sub>3</sub> *AQI              | 0.003    | 0.001 |
| PM10*CO                          | -0.132   | 0.143 |
| PM10*NO <sub>2</sub>             | 0.007    | 0.002 |
| PM10*SO <sub>2</sub>             | -0.004   | 0.012 |
| CO*NO <sub>2</sub>               | 0.825    | 0.241 |
| CO*PM2.5                         | 0.286    | 0.263 |
| CO*SO <sub>2</sub>               | 0.749    | 0.734 |
| CO*AQI                           | -0.394   | 0.272 |
| NO <sub>2</sub> *PM2.5           | -0.012   | 0.003 |
| NO <sub>2</sub> *SO <sub>2</sub> | -0.005   | 0.012 |
| NO <sub>2</sub> *AQI             | -0.002   | 0.003 |
| PM2.5*SO <sub>2</sub>            | -0.033   | 0.021 |
| SO <sub>2</sub> *AQI             | 0.048    | 0.016 |

\* Dependent Variable: construction sites number of Gongshu district

For Xiaoshan district:

**Table S23.** Correlative coefficients of Xiaoshan district

| Model                           | Unstandardised Coefficients     |            |
|---------------------------------|---------------------------------|------------|
|                                 | B                               | Std. Error |
| (Constant)                      | 252.375                         | 18.422     |
| O <sub>3</sub>                  | -0.208                          | 0.226      |
| PM10                            | -0.117                          | 0.499      |
| CO                              | 7.083                           | 37.720     |
| NO <sub>2</sub>                 | -1.652                          | 0.642      |
| PM2.5                           | 0.583                           | 0.821      |
| SO <sub>2</sub>                 | 4.943                           | 5.000      |
| AQI                             | 0.417                           | 0.659      |
| PM10 <sup>2</sup>               | -0.002                          | 0.001      |
| CO <sup>2</sup>                 | -25.430                         | 27.422     |
| NO <sub>2</sub> <sup>2</sup>    | 0.012                           | 0.008      |
| PM2.5 <sup>2</sup>              | 0.005                           | 0.008      |
| SO <sub>2</sub> <sup>2</sup>    | -0.185                          | 0.550      |
| AQI <sup>2</sup>                | -0.016                          | 0.011      |
| O <sub>3</sub> *PM10            | 0.003                           | 0.003      |
| O <sub>3</sub> *CO              | 0.102                           | 0.207      |
| O <sub>3</sub> *NO <sub>2</sub> | -0.007                          | 0.005      |
| O <sub>3</sub> *PM2.5           | -0.005                          | 0.005      |
| 4                               | O <sub>3</sub> *SO <sub>2</sub> | 0.026      |
|                                 | O <sub>3</sub> *AQI             | 0.006      |
|                                 | PM10*CO                         | 0.489      |
|                                 | PM10*NO <sub>2</sub>            | 0.009      |
|                                 | PM10*SO <sub>2</sub>            | 0.075      |
|                                 | CO*NO <sub>2</sub>              | 0.736      |
|                                 | CO*PM2.5                        | 0.807      |

|                                  |        |       |
|----------------------------------|--------|-------|
| CO*SO <sub>2</sub>               | -2.082 | 3.989 |
| CO*AQI                           | -0.215 | 0.713 |
| NO <sub>2</sub> *PM2.5           | -0.031 | 0.016 |
| NO <sub>2</sub> *SO <sub>2</sub> | 0.087  | 0.099 |
| NO <sub>2</sub> *AQI             | 0.018  | 0.013 |
| PM2.5*SO <sub>2</sub>            | -0.081 | 0.122 |
| PM2.5*AQI                        | 0.013  | 0.014 |
| SO <sub>2</sub> *AQI             | -0.078 | 0.094 |

\* Dependent Variable: construction sites number of Xiaoshan district.
